# Supplementary material for: Comparison of transcriptional expression patterns of phenols and carotenoids in ‘Kyoho’ grapes under a two-crop-a-year cultivation system
Source: PubMed Central journal article supplement (PMC6328245; doi:10.1371/journal.pone.0210322), 2019-01-10
Supplement: pone.0210322.s001.pdf [file pone.0210322.s001.pdf]

| <b>Gene name</b> | <b>Forward primer(5'-3')</b> | <b>Reverse primer(5'-3')</b> |
|------------------|------------------------------|------------------------------|
| <i>PSY1</i>      | TGGGCAATTTATGTGTGGTGCAG      | GCCTTGGGTGACATGTGTGAAG       |
| <i>PSY2</i>      | TCGATGTGGTGAAGTTTGTGCAG      | TCAGGTGTCATCAGCATTGTTCCC     |
| <i>CCD4a</i>     | TGAAGCTGGACGTGTCCCAAAC       | TAGCACCTGGTCCATACATCCTG      |
| <i>CCD4b</i>     | GTTGGAATCATCCCTCGTT          | CCTCGTCCCAGGCGTTA            |
| <i>NCED</i>      | GCAGAGGACGAGAGTGTAAAGGA      | GCAGAGTAAAAACACATGAAGCTAGTG  |
| <i>LBCY</i>      | ATGGATGCTGCAATTGGCCTTC       | TCCCGACTGGGTTCATGGATTAAG     |
| <i>ANR</i>       | CTTGATGGGACAGGTCTGGT         | TGTCTTGGAGGCAGGATAGC         |
| <i>F3'H</i>      | ACTCATGGTGCACCCACG           | CACAAACTACTAAACTCGCTC        |
| <i>F3'5'H</i>    | AAACCGCTCAGACCAAAC           | ACTAAGCCACAGGAACTAA          |
| <i>STS1</i>      | CATCGGTGAAGGATTGGATTG        | ACATTGAAGGGTCGAGCATTTC       |
| <i>LARI</i>      | CTCCAACGGATTTCTTCC           | CGTCCACTGTTTTTCATCGT         |
| <i>LAR2</i>      | TAAACGAGCTGGCATCAC           | GCAGCGGCTAGTAGGTCA           |
| <i>DFR</i>       | GAAACCTGTAGATGGCAAGA         | GGCCAAATCAAACCTACCAGA        |
| <i>UFGT</i>      | GGGATGGTAATGGCTGTGG          | ACATGGGTGGAGAGTGAGTT         |
| <i>Ubiquitin</i> | GTGGTATTATTGAGCCATCCTT       | AACCTCCAATCCAGTCATCTAC       |
| <i>Actin</i>     | GCATCCCTCAGCACCTTCCAGCAG     | CCACCTCAACACATCTCCATGTCAA    |
