# Supplementary material for: Comparison of transcriptional expression patterns of phenols and carotenoids in ‘Kyoho’ grapes under a two-crop-a-year cultivation system
Source: PubMed Central journal article supplement (PMC6328245; doi:10.1371/journal.pone.0210322), 2019-01-10
Supplement: pone.0210322.s002.pdf [file pone.0210322.s002.pdf]

| <b>Gene ID</b>    | <b>GO annotation</b>                                                 |
|-------------------|----------------------------------------------------------------------|
| VIT_02s0087g00910 | 9- <i>cis</i> -epoxycarotenoid dioxygenase activity (GO:0045549)     |
| VIT_02s0025g00240 | Carotene metabolic process (GO:0016119)                              |
| VIT_15s0024g01540 | Glutathione transferase activity(GO:0004364)                         |
| VIT_12s0028g00920 | Glutathione transferase activity(GO:0004364)                         |
| VIT_12s0028g00930 | Glutathione transferase activity(GO:0004364)                         |
| VIT_06s0009g03050 | Flavonoid 3',5'-hydroxylase activity (GO:0033772)                    |
| VIT_06s0009g02810 | Flavonoid 3',5'-hydroxylase activity (GO:0033772)                    |
| VIT_18s0001g03430 | Flavonol synthase activity (GO:0045431)                              |
| VIT_16s0100g01100 | Defense response (GO:0006952)                                        |
| VIT_16s0100g01200 | Defense response (GO:0006952)                                        |
| VIT_03s0063g00140 | Caffeic acid <i>O</i> -methyltransferase activity (GO:0042409)       |
| VIT_05s0062g00640 | Anthocyanidin 5- <i>O</i> -glucosyltransferase activity (GO:0080018) |
| VIT_16s0100g01150 | Defense response (GO:0006952)                                        |
| VIT_02s0087g00930 | 9- <i>cis</i> -epoxycarotenoid dioxygenase activity (GO:0045549)     |
| VIT_08s0007g05690 | Lycopene beta-cyclase activity (GO:0045436)                          |
| VIT_08s0040g01710 | Phenylalanine ammonia-lyase activity (GO:0045548)                    |
| VIT_18s0001g14310 | Flavonoid biosynthetic process (GO:009813)                           |
| VIT_19s0093g00550 | 9- <i>cis</i> -epoxycarotenoid dioxygenase activity (GO:0045549)     |
| VIT_16s0100g00750 | Defense response (GO:0006952)                                        |
| VIT_16s0039g02350 | Flavonoid biosynthetic process (GO:009813)                           |
